# Supplementary material
Source: ML conference proceedings conference paper supplement (https://aclanthology.org/2024.emnlp-main.811)
Supplement: software [file 2024.emnlp-main.811.software.zip]

### Conversation History Task

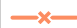

Gigaword

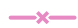

Rotten Tomatoes

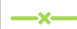

MMLU Abstract Algebra

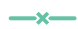

**TweetQA**

LLAMA-7B

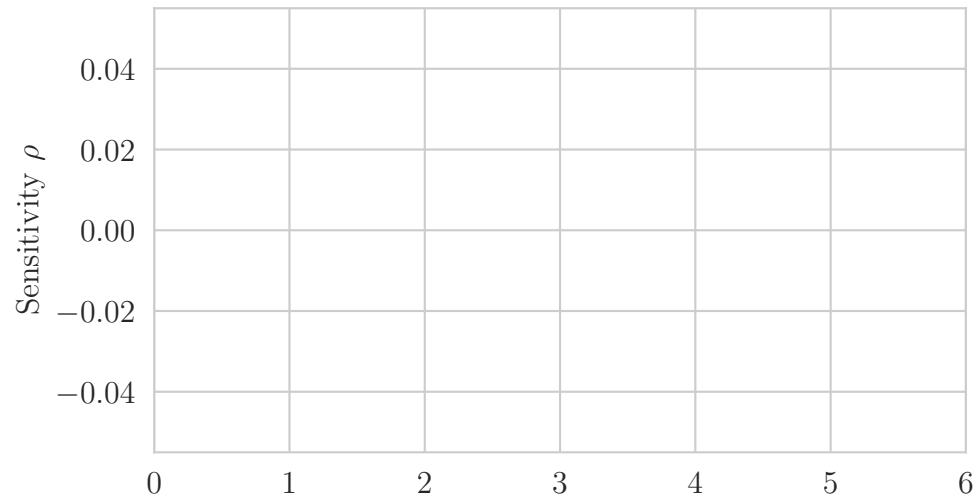

Mistral-7B

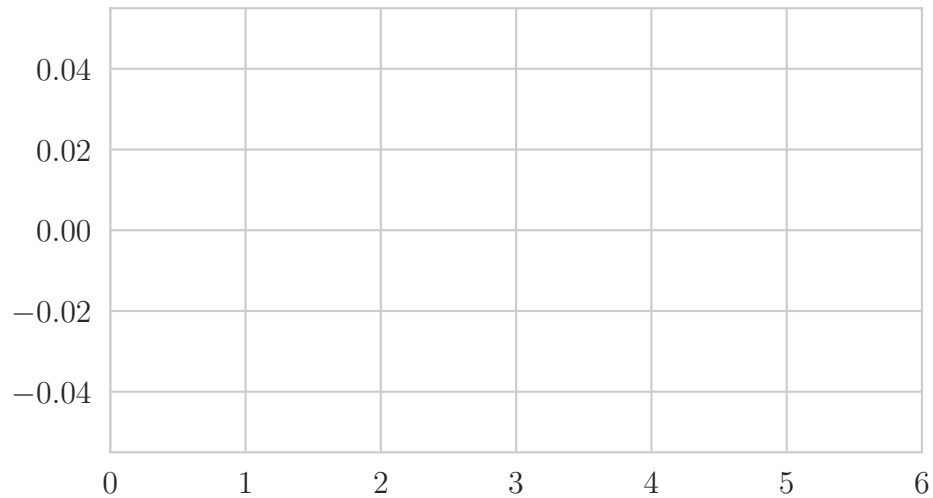

Conversation History Length  $L$
