# Supplementary material
Source: ML conference proceedings conference paper supplement (https://aclanthology.org/2024.emnlp-main.811)
Supplement: software [file 2024.emnlp-main.811.software.zip]

# Conversation History Task

—x— Gigaword

—x— MMLU Abstract Algebra

—x— Rotten Tomatoes

—x— TweetQA

## GPT-3.5

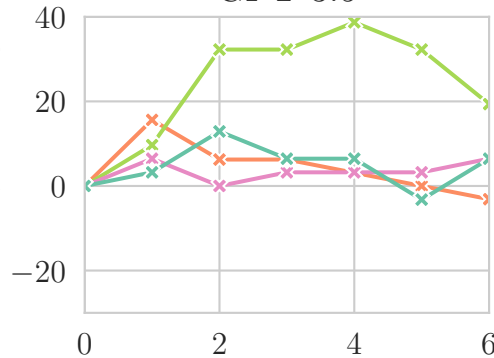

## GPT-4

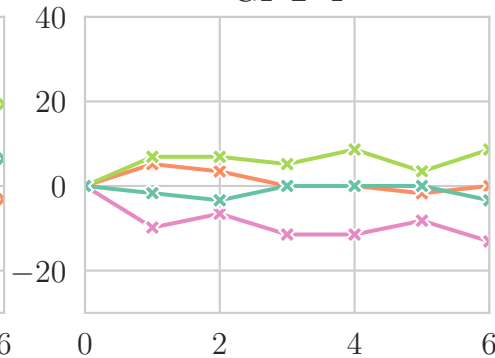

## Llama-7B

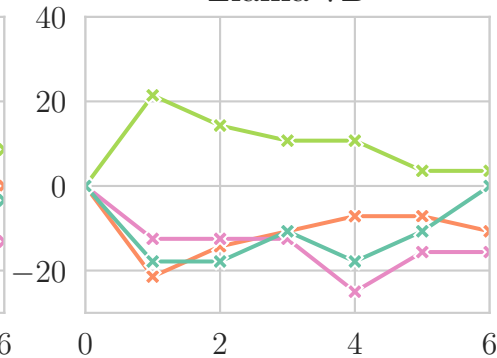

## Mistral-7B

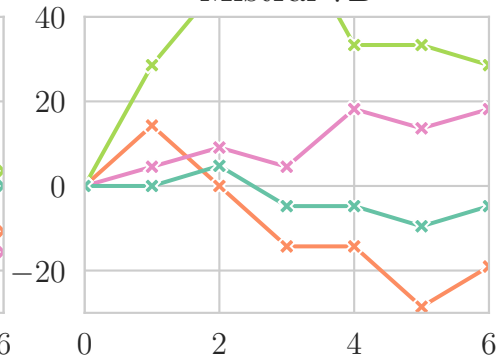

Conversation History Length  $L$
