# Supplementary material
Source: ML conference proceedings conference paper supplement (https://aclanthology.org/2024.emnlp-main.811)

# Conversation History Task

- Gigaword
- Rotten Tomatoes
- MMLU Human Aging
- TweetQA

## GPT-3.5

## GPT-4

## LLAMA-7B

## Mistral-7B

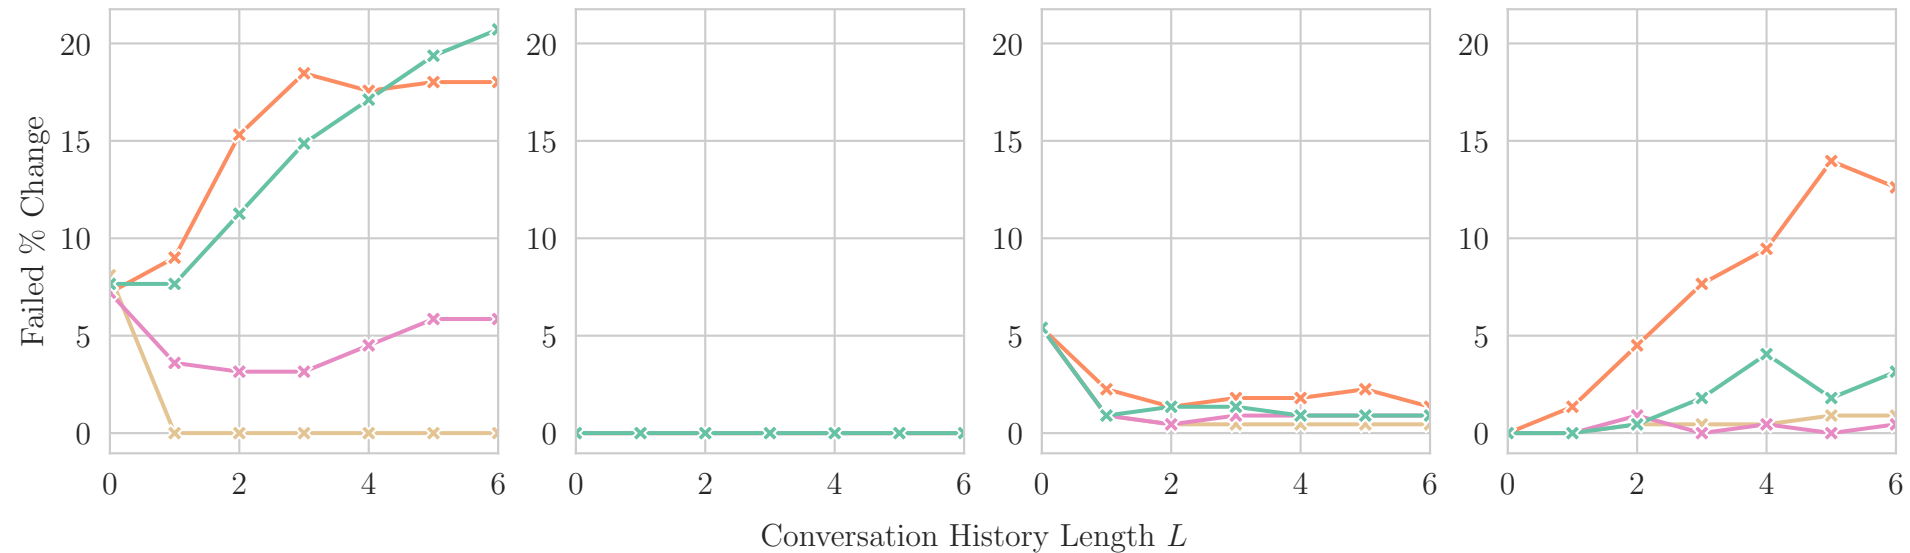

Supplement: software [file 2024.emnlp-main.811.software.zip]
