# Supplementary material
Source: ML conference proceedings conference paper supplement (https://aclanthology.org/2024.emnlp-main.811)

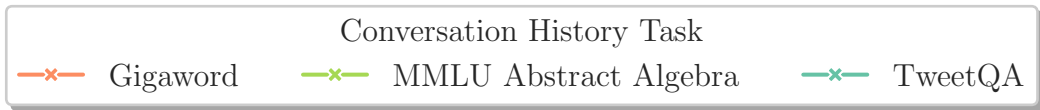

Llama-7B

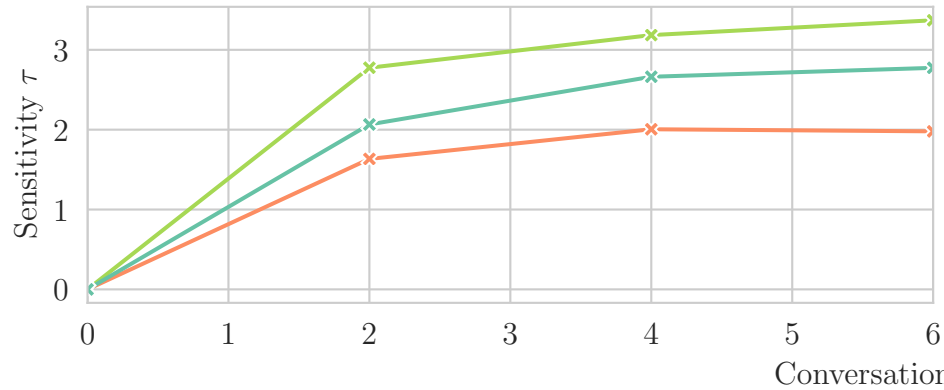

Mistral-7B

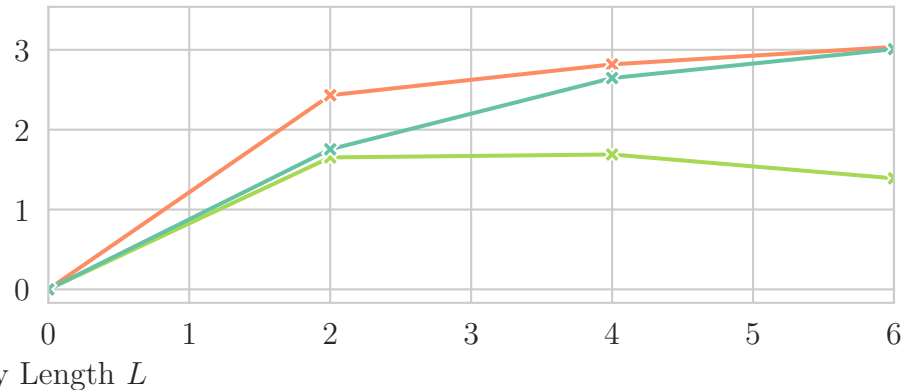

Supplement: software [file 2024.emnlp-main.811.software.zip]

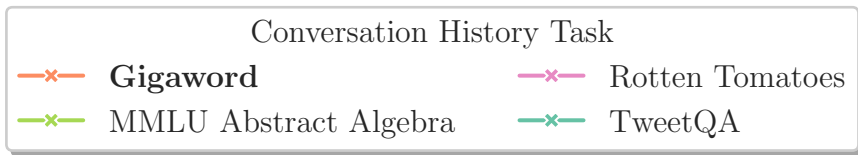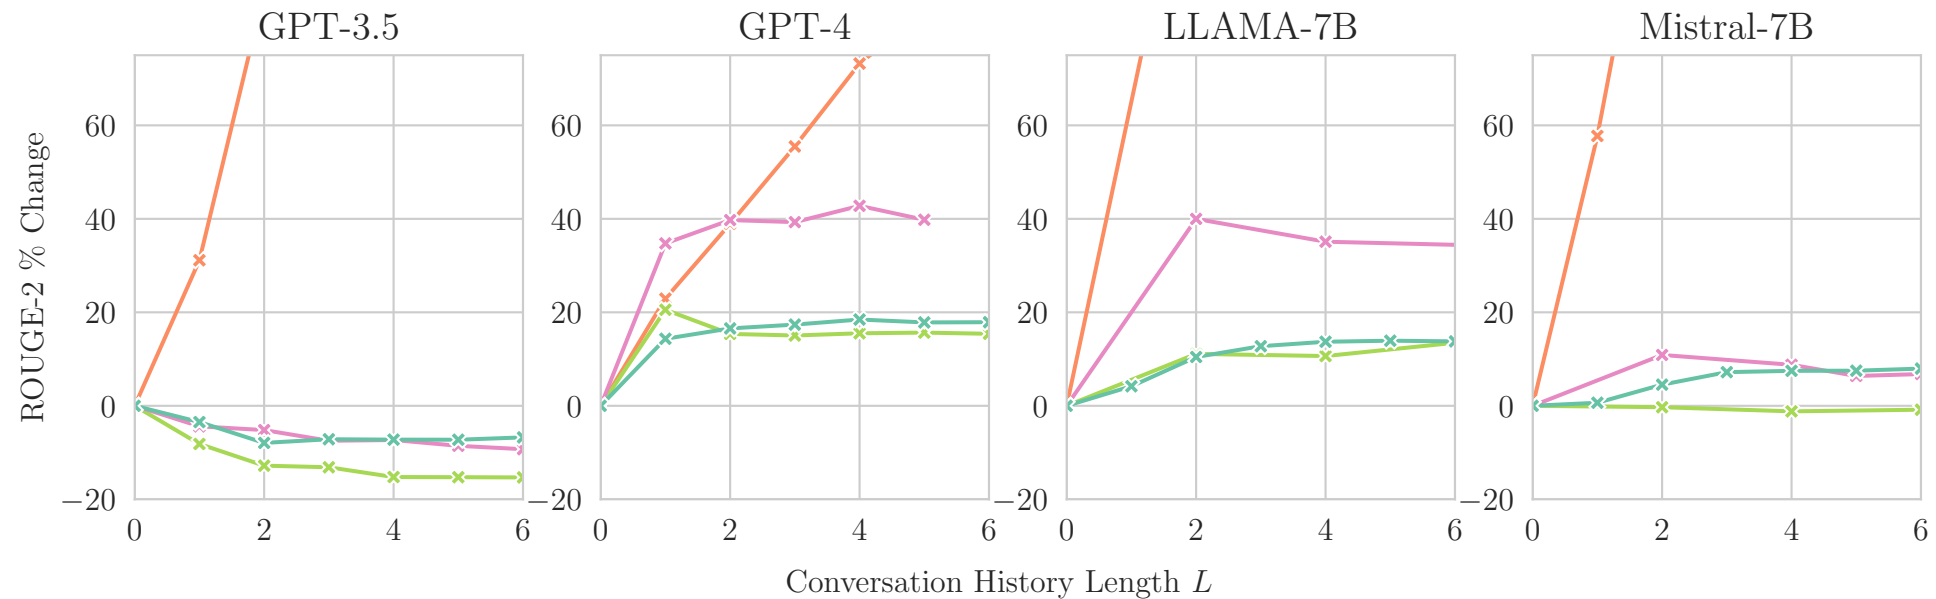

Supplement: software [file 2024.emnlp-main.811.software.zip]

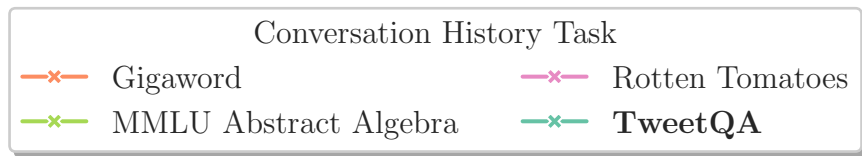

GPT-3.5

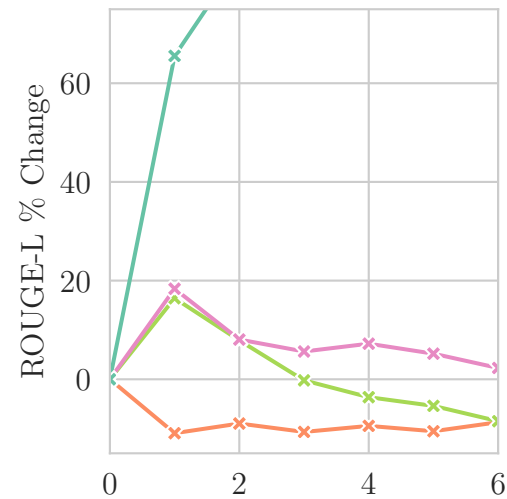

GPT-4

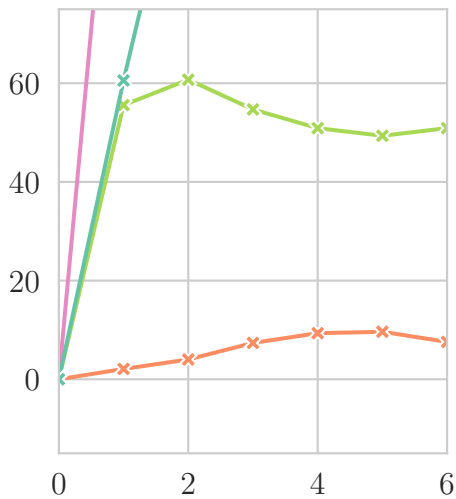

LLAMA-7B

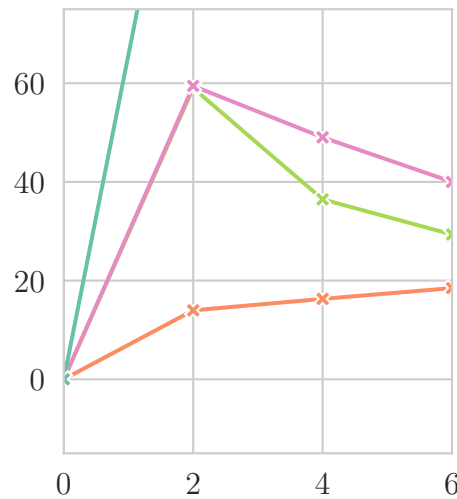

Mistral-7B

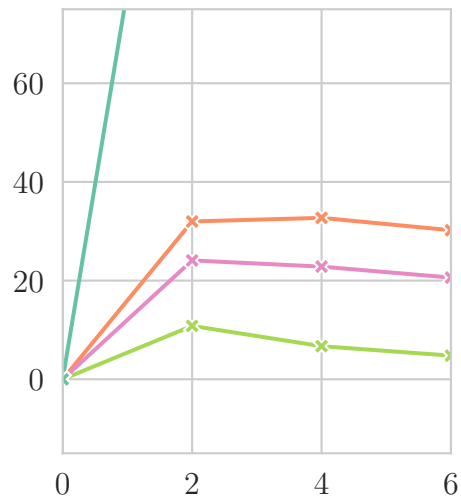

Conversation History Length  $L$

Supplement: software [file 2024.emnlp-main.811.software.zip]

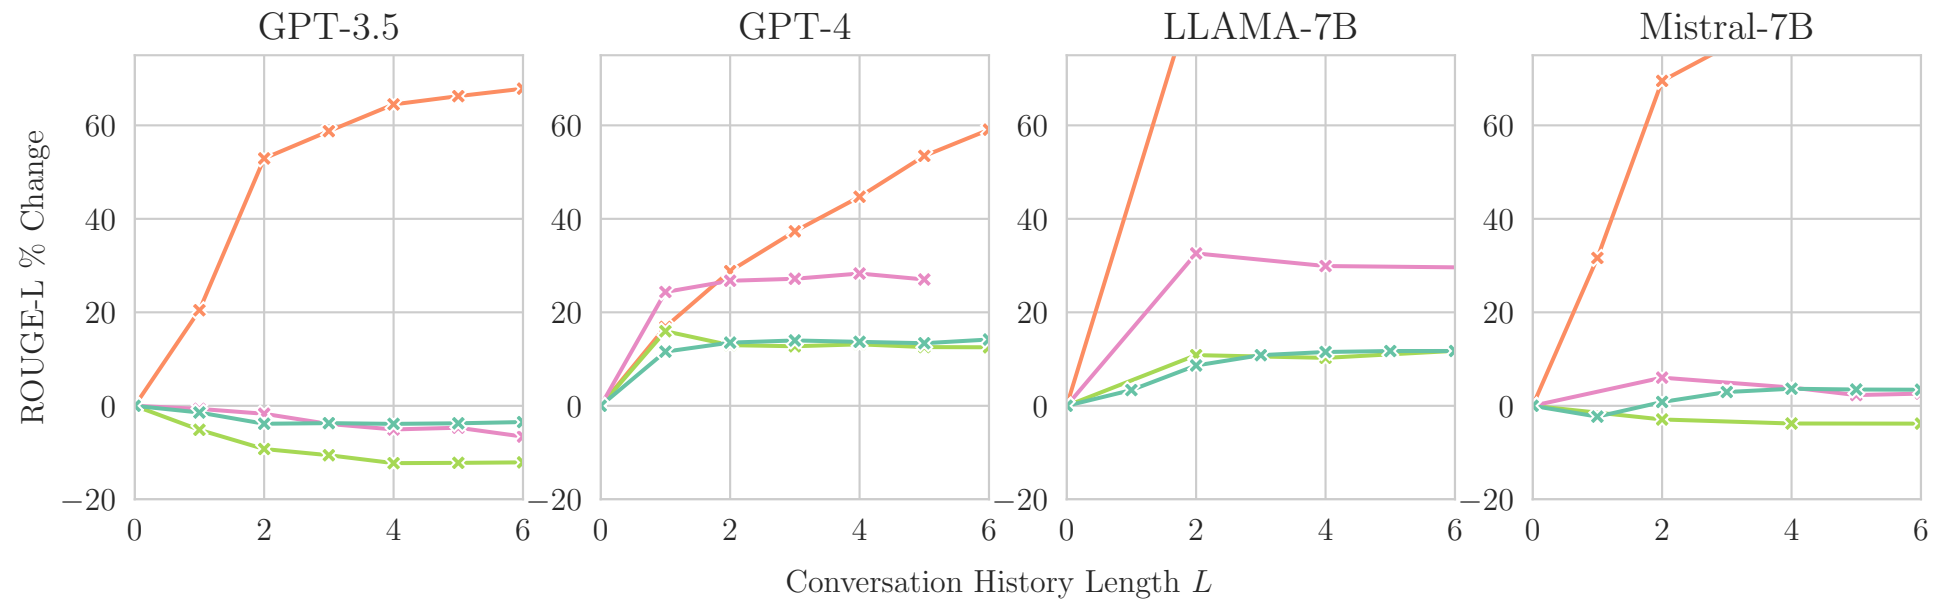

Supplement: software [file 2024.emnlp-main.811.software.zip]



GPT-3.5

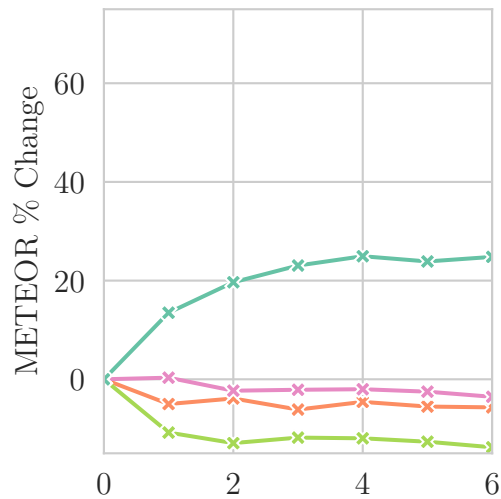

GPT-4

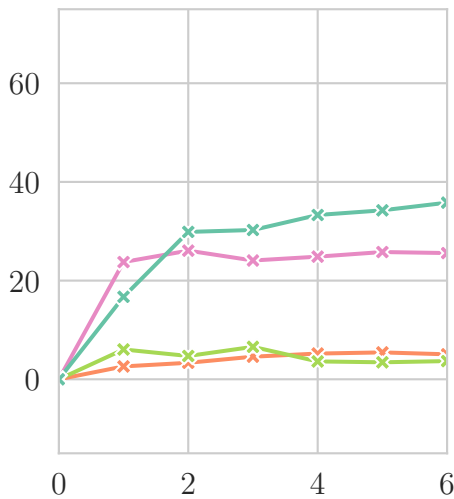

LLAMA-7B

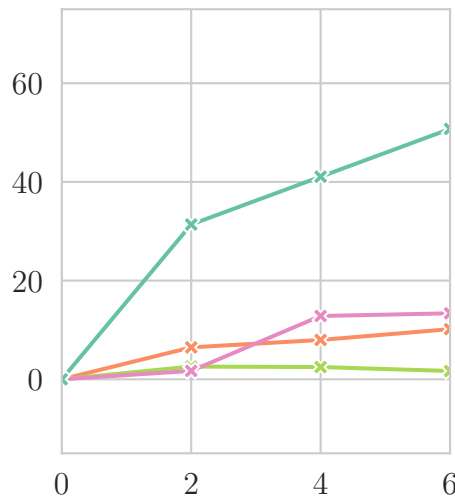

Mistral-7B

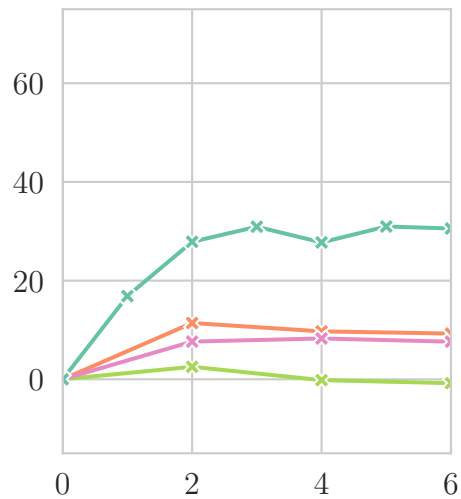

Conversation History Length  $L$

Supplement: software [file 2024.emnlp-main.811.software.zip]



Llama-7B

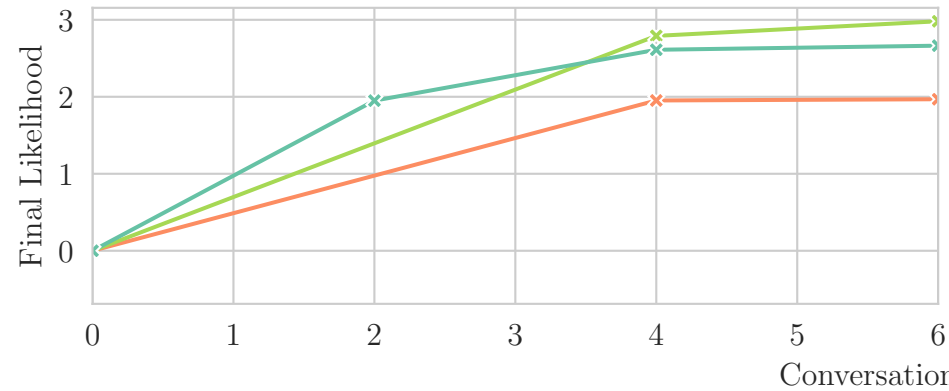

Mistral-7B

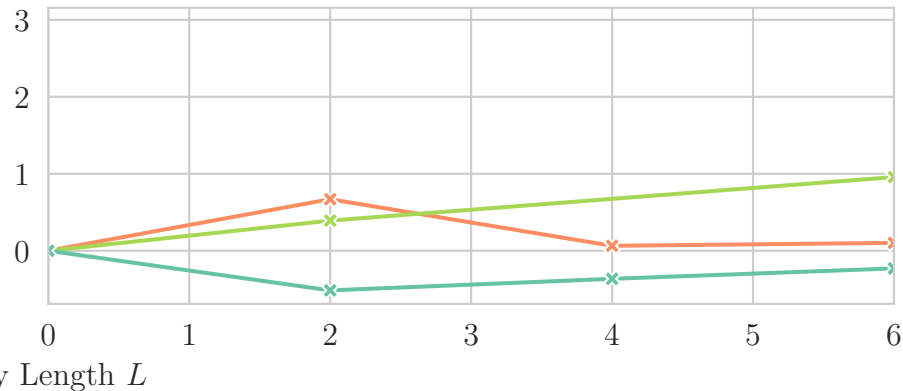

Supplement: software [file 2024.emnlp-main.811.software.zip]

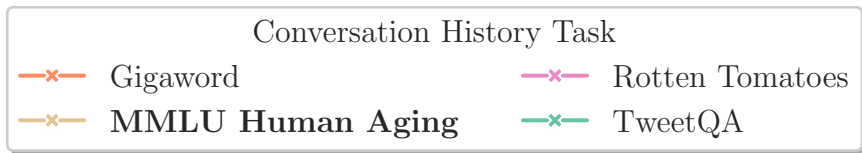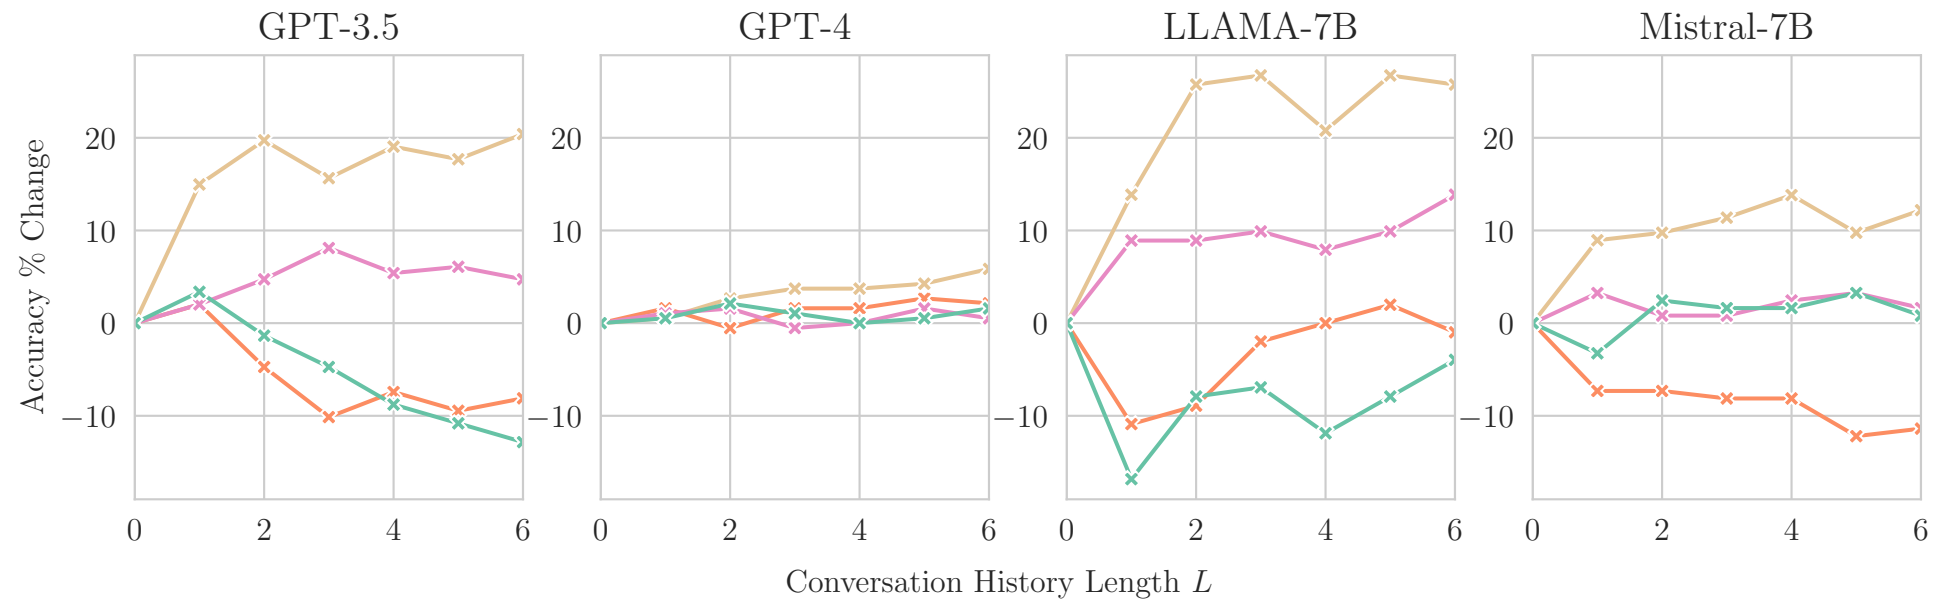

Supplement: software [file 2024.emnlp-main.811.software.zip]

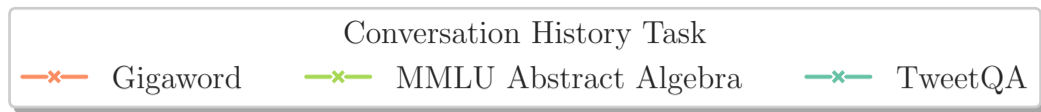

LLAMA-7B

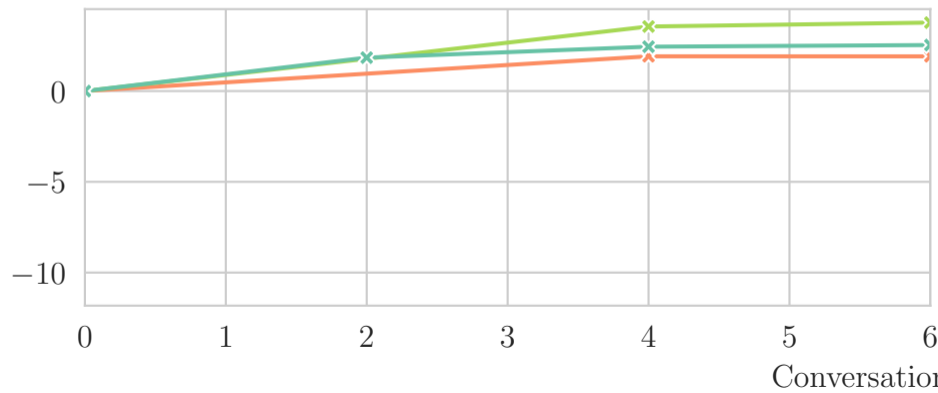

Mistral-7B

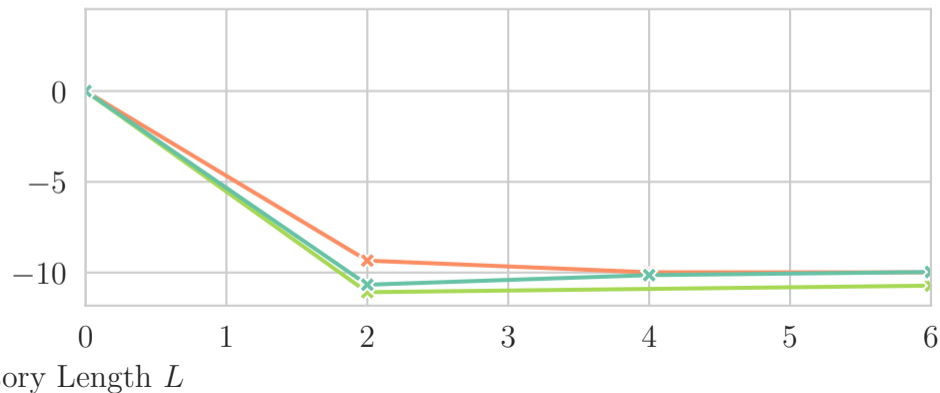

Supplement: software [file 2024.emnlp-main.811.software.zip]



GPT-3.5

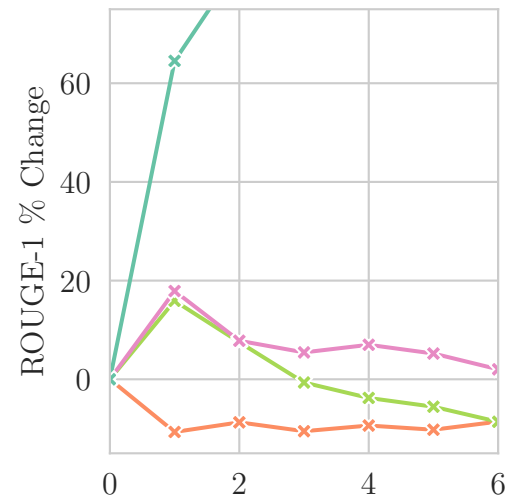

GPT-4

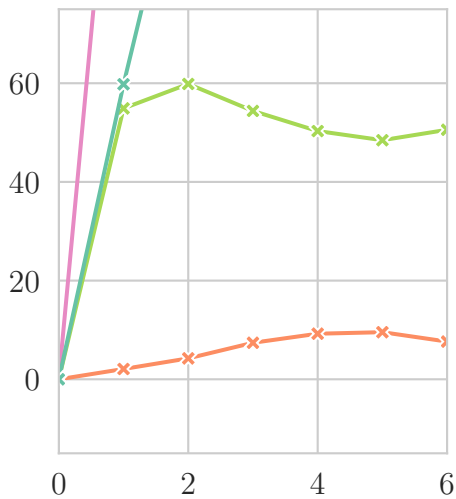

LLAMA-7B

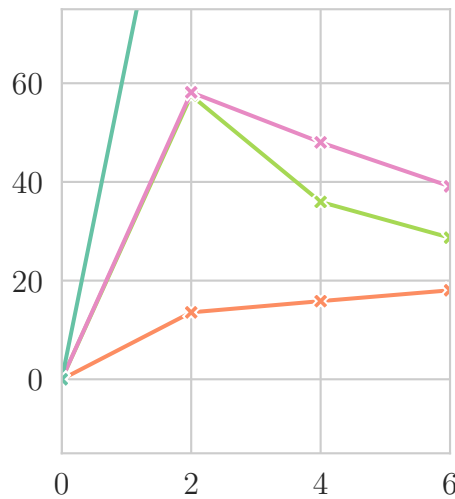

Mistral-7B

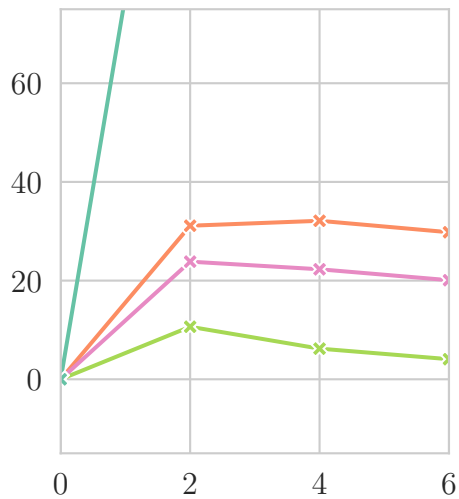

Conversation History Length  $L$

Supplement: software [file 2024.emnlp-main.811.software.zip]

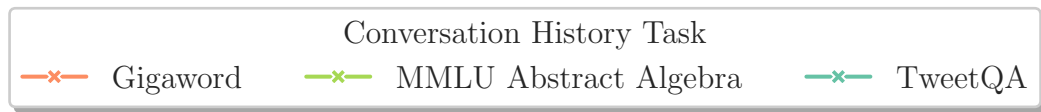

Llama-7B

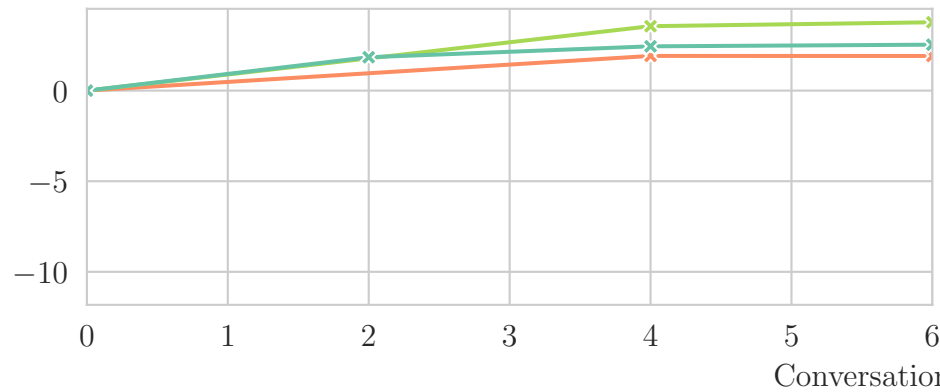

Mistral-7B

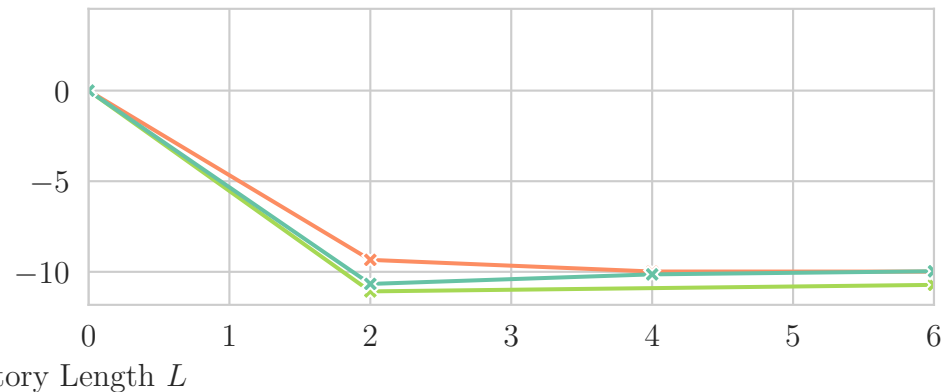

Supplement: software [file 2024.emnlp-main.811.software.zip]



LLAMA-7B



Mistral-7B



Supplement: software [file 2024.emnlp-main.811.software.zip]



LLAMA-7B



Mistral-7B



Supplement: software [file 2024.emnlp-main.811.software.zip]

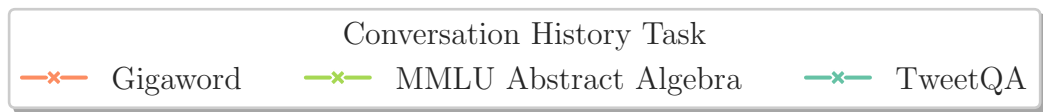

LLAMA-7B

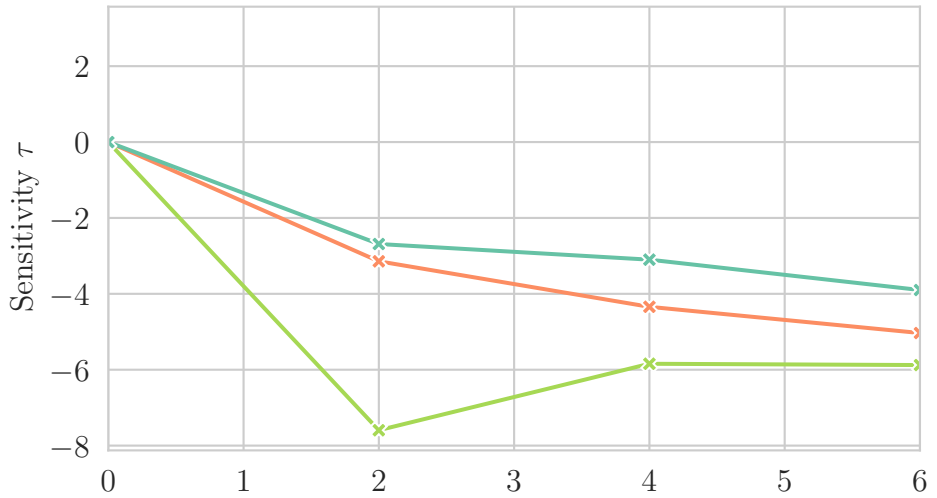

Mistral-7B

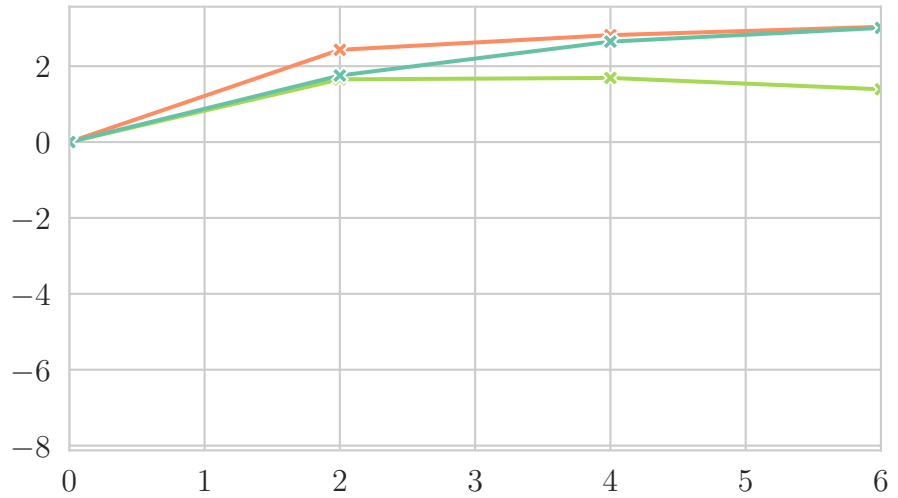

Conversation History Length  $L$

Supplement: software [file 2024.emnlp-main.811.software.zip]

Accuracy % Change

GPT-3.5

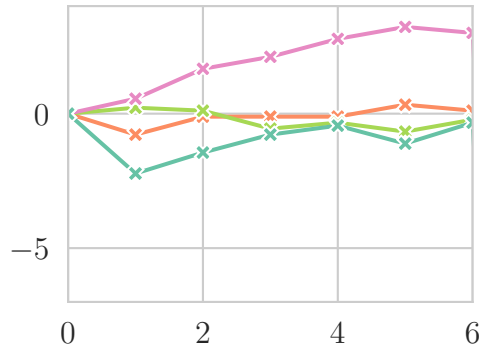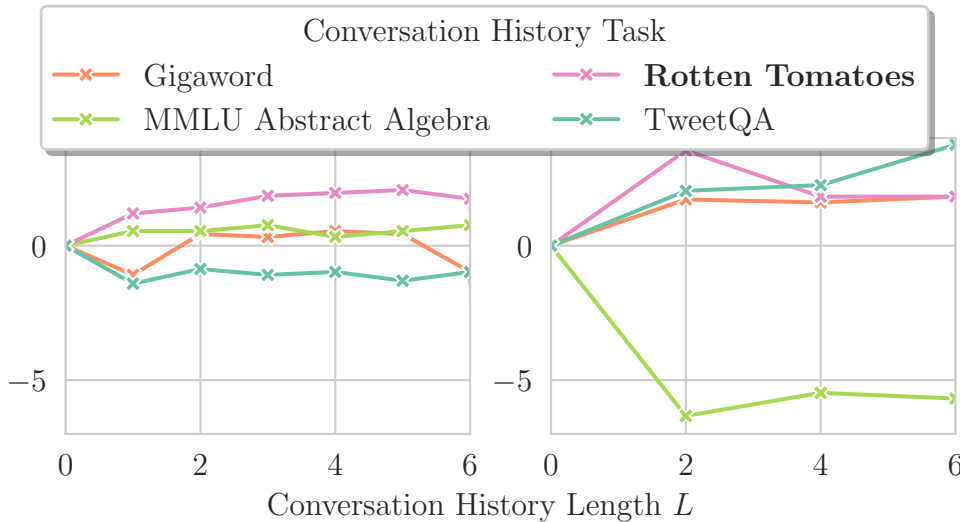

Mistral-7B

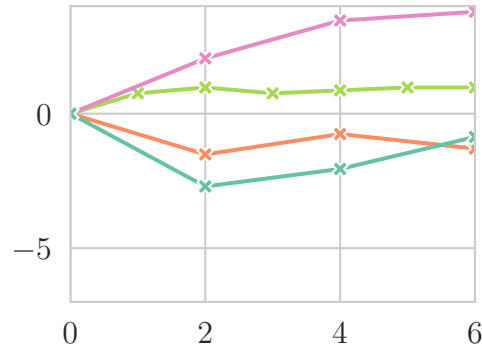

Supplement: software [file 2024.emnlp-main.811.software.zip]

Conversation History Task

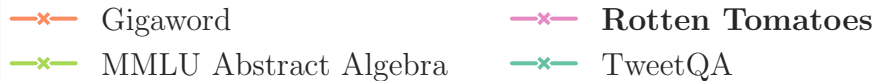

GPT-3.5

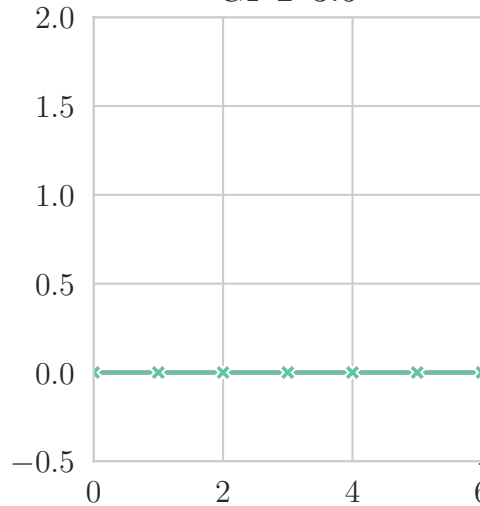

GPT-4

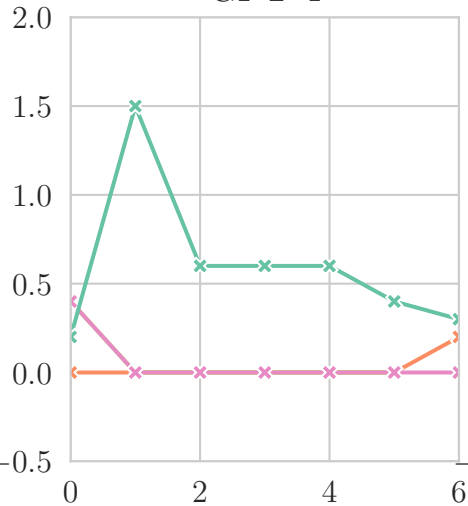

LLAMA-7B

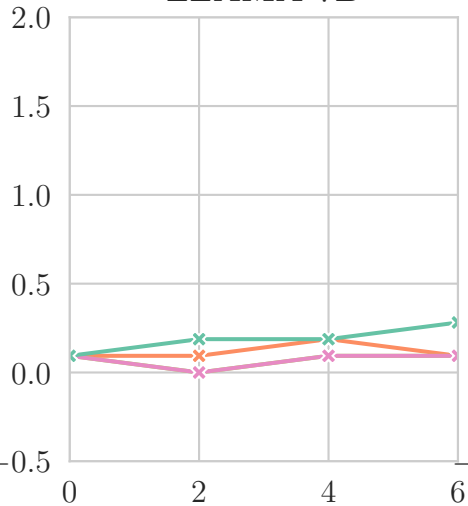

Mistral-7B

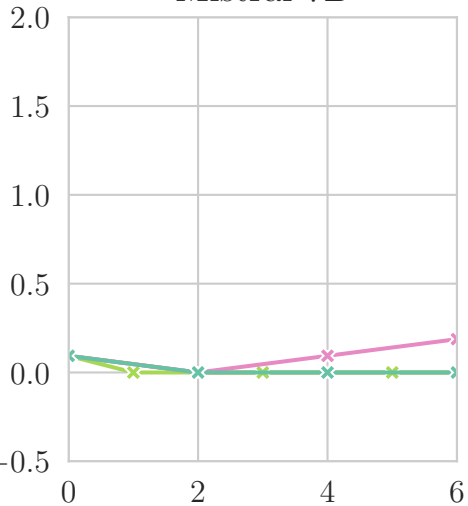

Conversation History Length  $L$

Supplement: software [file 2024.emnlp-main.811.software.zip]



GPT-3.5

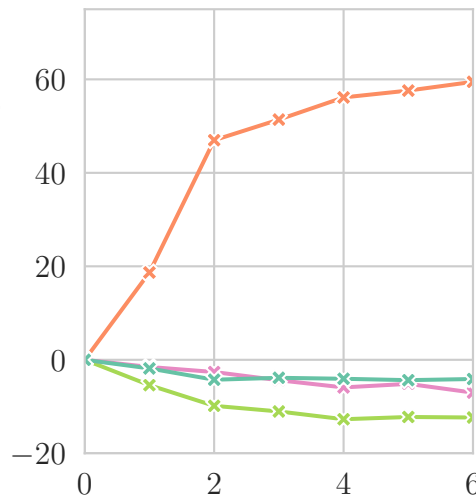

GPT-4

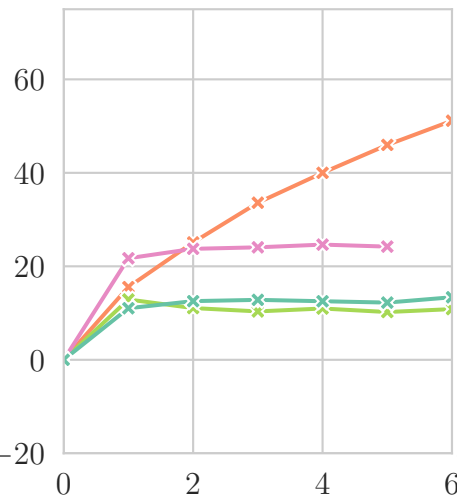

LLAMA-7B

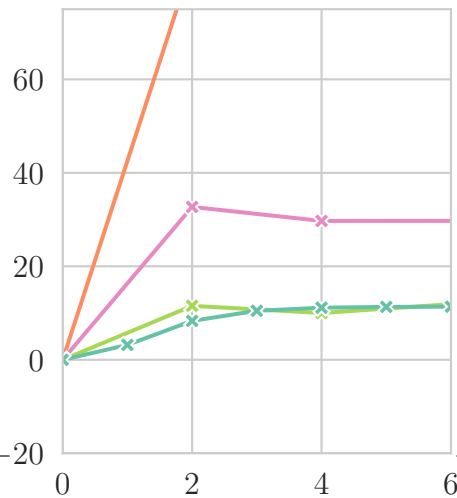

Mistral-7B

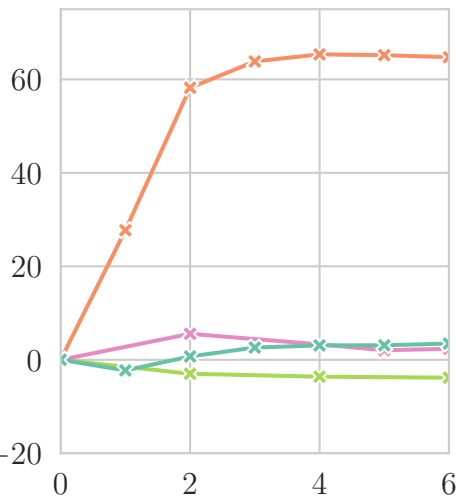

Conversation History Length  $L$

Supplement: software [file 2024.emnlp-main.811.software.zip]



LLAMA-7B



Mistral-7B



Supplement: software [file 2024.emnlp-main.811.software.zip]
